# Supplementary material
Source: bioRxiv or medRxiv preprint supplement (https://medrxiv.org/highwire/filestream/69356/field_highwire_adjunct_files/0/19008086-1.pdf)
Supplement: Supplementary file [file 19008086-1.pdf]

Forecasting seizure risk over days  
Supplementary material

Proix et al.

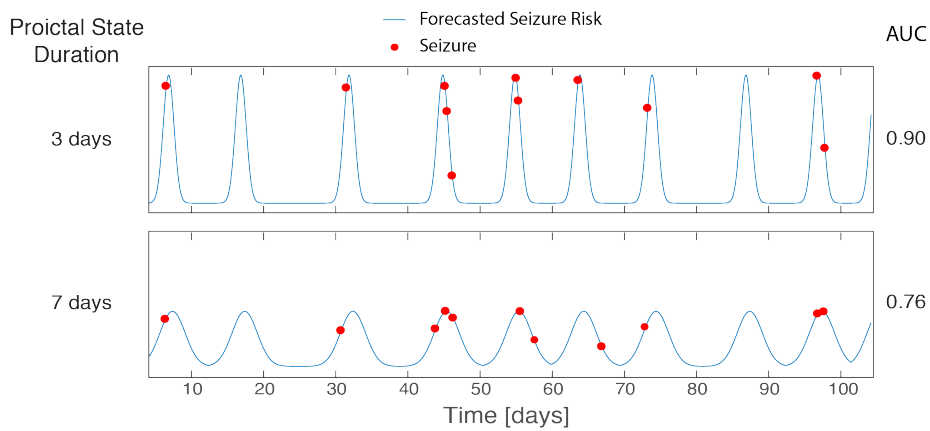

Supplementary Fig. 1: **Metric of model performance depends on proictal state duration.** In these ideal simulated examples, blue line depicts forecasted seizure risk over 100 days with 9 recurrent pro-ictal states (High-Risk for seizures) at about 10 days intervals. The duration of each individual pro-ictal state is 3 (top) and 7 (bottom) days. Red dots show seizures, which occur stochastically when seizure risk is greater than zero. In both cases, all seizures occur during pro-ictal states (Sensitivity 100%) but their different durations result in different AUC STiW, as longer pro-ictal states increase proportion of time in warning. AUCs on the right were calculated for 1000 realizations of these ideal simulated forecasts with 40 seizures over one year. This example also illustrates that even an AUC around 0.7 can reflect a perfectly sensitive forecast.

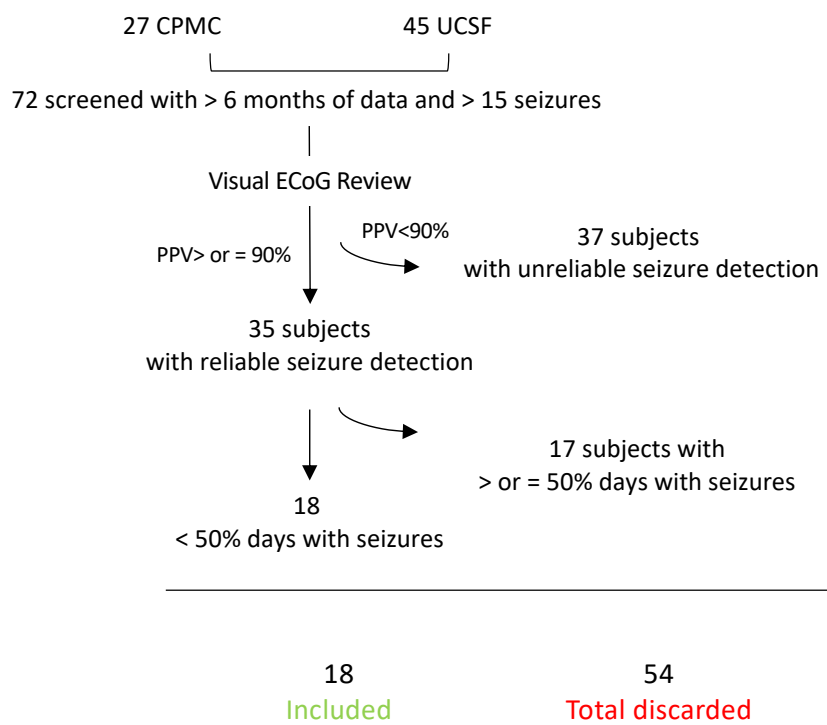

Supplementary Fig. 2: Flow chart for subject selection

| ID | Age | Sex | Laterality | Focus             | Recording duration [days] | # days with seizures | # hours with seizures | % days with seizures | % hours with seizures |
|----|-----|-----|------------|-------------------|---------------------------|----------------------|-----------------------|----------------------|-----------------------|
| 1  | 20  | M   | L          | Temporo-cortical  | 286                       | 45                   | 57                    | 15.8%                | 0.8%                  |
| 2  | 54  | F   | Bl         | Mesiotemporal     | 388                       | 118                  | 166                   | 30.5%                | 1.8%                  |
| 3  | 38  | M   | Bl         | Mesiotemporal     | 441                       | 127                  | 187                   | 28.8%                | 1.8%                  |
| 4  | 30  | F   | L          | Temporo-occipital | 304                       | 145                  | 177                   | 47.7%                | 2.4%                  |
| 5  | 41  | M   | L          | Temporo-cortical  | 871                       | 28                   | 34                    | 3.2%                 | 0.2%                  |
| 6  | 52  | M   | Bl         | Mesiotemporal     | 439                       | 129                  | 133                   | 29.4%                | 1.3%                  |
| 7  | 39  | F   | L          | Mesiotemporal     | 541                       | 99                   | 112                   | 18.3%                | 0.9%                  |
| 8  | 36  | M   | L          | Temporo-cortical  | 365                       | 80                   | 128                   | 21.9%                | 1.5%                  |
| 9  | 26  | F   | L          | Mesiotemporal     | 227                       | 19                   | 31                    | 8.4%                 | 0.6%                  |
| 10 | 55  | M   | Bl         | Mesiotemporal     | 503                       | 70                   | 132                   | 13.9%                | 1.1%                  |
| 11 | 32  | F   | R          | Occipital         | 447                       | 164                  | 250                   | 36.7%                | 2.3%                  |
| 12 | 51  | M   | Bl         | Mesiotemporal     | 1049                      | 231                  | 352                   | 22.0%                | 1.4%                  |
| 13 | 69  | F   | Bl         | Mesiotemporal     | 684                       | 133                  | 212                   | 19.4%                | 1.3%                  |
| 14 | 37  | M   | Bl         | Mesiotemporal     | 375                       | 63                   | 82                    | 16.9%                | 0.9%                  |
| 15 | 37  | F   | R          | Mesiotemporal     | 535                       | 31                   | 44                    | 5.8%                 | 0.3%                  |
| 16 | 35  | M   | Bl         | Mesiotemporal     | 280                       | 30                   | 33                    | 10.7%                | 4.9%                  |
| 17 | 23  | F   | Bl         | Mesiotemporal     | 414                       | 153                  | 195                   | 37.0%                | 2.0%                  |
| 18 | 39  | M   | R          | Mesiotemporal     | 942                       | 290                  | 569                   | 30.8%                | 2.5%                  |

Supplementary Table 1: **Subject characteristics**

| <b>Daily forecast</b> |                 |                     |            |           |                  |
|-----------------------|-----------------|---------------------|------------|-----------|------------------|
| ID                    | Recent seizures | Weekly distribution | Recent IEA | Ultradian | Multidien phases |
| 1                     | 0.68            | 0.55                | 0.63       | 0.66      | 0.73             |
| 2                     | 0.58            | 0.64                | 0.59       | 0.60      | 0.74             |
| 3                     | 0.56            | 0.57                | 0.58       | 0.57      | 0.58             |
| 4                     | 0.62            | 0.58                | 0.53       | 0.59      | 0.59             |
| 5                     | 0.49            | 0.51                | 0.62       | 0.54      | 0.97             |
| 6                     | 0.62            | 0.62                | 0.53       | 0.56      | 0.65             |
| 7                     | 0.48            | 0.46                | 0.63       | 0.55      | 0.87             |
| 8                     | 0.42            | 0.47                | 0.60       | 0.51      | 0.73             |
| 9                     | 0.54            | 0.49                | 0.54       | 0.69      | 0.84             |
| 10                    | 0.47            | 0.55                | 0.55       | 0.42      | 0.85             |
| 11                    | 0.66            | 0.65                | 0.61       | 0.65      | 0.69             |
| 12                    | 0.60            | 0.50                | 0.63       | 0.60      | 0.70             |
| 13                    | 0.55            | 0.49                | 0.61       | 0.59      | 0.68             |
| 14                    | 0.64            | 0.60                | 0.61       | 0.62      | 0.69             |
| 15                    | 0.62            | 0.45                | 0.74       | 0.66      | 0.88             |
| 16                    | 0.62            | 0.54                | 0.62       | 0.46      | 0.80             |
| 17                    | 0.59            | 0.60                | 0.65       | 0.61      | 0.73             |
| 18                    | 0.56            | 0.58                | 0.65       | 0.59      | 0.65             |

  

| <b>Hourly forecast</b> |                 |                        |            |           |                  |
|------------------------|-----------------|------------------------|------------|-----------|------------------|
| ID                     | Recent seizures | Circadian distribution | Recent IEA | Ultradian | Multidien phases |
| 1                      | 0.79            | 0.58                   | 0.61       | 0.58      | 0.72             |
| 2                      | 0.52            | 0.57                   | 0.57       | 0.57      | 0.66             |
| 3                      | 0.56            | 0.58                   | 0.59       | 0.53      | 0.60             |
| 4                      | 0.49            | 0.78                   | 0.56       | 0.55      | 0.52             |
| 5                      | 0.50            | 0.53                   | 0.52       | 0.63      | 0.95             |
| 6                      | 0.53            | 0.60                   | 0.60       | 0.61      | 0.62             |
| 7                      | 0.52            | 0.56                   | 0.66       | 0.65      | 0.84             |
| 8                      | 0.49            | 0.63                   | 0.53       | 0.49      | 0.76             |
| 9                      | 0.53            | 0.46                   | 0.43       | 0.45      | 0.81             |
| 10                     | 0.59            | 0.55                   | 0.61       | 0.59      | 0.85             |
| 11                     | 0.50            | 0.62                   | 0.65       | 0.58      | 0.63             |
| 12                     | 0.58            | 0.54                   | 0.58       | 0.57      | 0.71             |
| 13                     | 0.61            | 0.55                   | 0.56       | 0.53      | 0.66             |
| 14                     | 0.57            | 0.71                   | 0.56       | 0.57      | 0.74             |
| 15                     | 0.59            | 0.76                   | 0.71       | 0.72      | 0.89             |
| 16                     | 0.50            | 0.43                   | 0.57       | 0.60      | 0.77             |
| 17                     | 0.49            | 0.64                   | 0.69       | 0.66      | 0.67             |
| 18                     | 0.68            | 0.68                   | 0.72       | 0.64      | 0.70             |

Supplementary Table 2: **Forecasting performances of the univariate models (AUC STiW)**

| <b>Daily forecast</b>  |            |                   |                                                       |                                                    |                                                      |
|------------------------|------------|-------------------|-------------------------------------------------------|----------------------------------------------------|------------------------------------------------------|
| ID                     | AUC scores | Surrogate p-value | Sensitivity for 25% of time in warning daily forecast | Time in warning for 75% sensitivity daily forecast | Optimal sensitivity - time in warning daily forecast |
| 1                      | 0.68       | 0.010             | 0.39                                                  | 0.43                                               | 0.70 - 0.35                                          |
| 2                      | 0.73       | 0.005             | 0.57                                                  | 0.50                                               | 0.65 - 0.32                                          |
| 3                      | 0.60       | 0.210             | 0.37                                                  | 0.61                                               | 0.54 - 0.38                                          |
| 4                      | 0.59       | 0.368             | 0.36                                                  | 0.62                                               | 0.57 - 0.39                                          |
| 5                      | 0.95       | 0.005             | 0.90                                                  | 0.03                                               | 0.90 - 0.12                                          |
| 6                      | 0.67       | 0.025             | 0.53                                                  | 0.60                                               | 0.55 - 0.25                                          |
| 7                      | 0.86       | 0.005             | 0.85                                                  | 0.17                                               | 0.92 - 0.27                                          |
| 8                      | 0.73       | 0.005             | 0.58                                                  | 0.43                                               | 0.55 - 0.15                                          |
| 9                      | 0.71       | 0.115             | 0.57                                                  | 0.40                                               | 0.86 - 0.40                                          |
| 10                     | 0.77       | 0.005             | 0.70                                                  | 0.33                                               | 0.73 - 0.26                                          |
| 11                     | 0.70       | 0.005             | 0.54                                                  | 0.47                                               | 0.54 - 0.24                                          |
| 12                     | 0.70       | 0.005             | 0.51                                                  | 0.45                                               | 0.65 - 0.36                                          |
| 13                     | 0.68       | 0.005             | 0.47                                                  | 0.50                                               | 0.64 - 0.30                                          |
| 14                     | 0.77       | 0.005             | 0.68                                                  | 0.46                                               | 0.68 - 0.24                                          |
| 15                     | 0.90       | 0.005             | 0.90                                                  | 0.10                                               | 0.90 - 0.16                                          |
| 16                     | 0.77       | 0.015             | 0.57                                                  | 0.28                                               | 0.79 - 0.28                                          |
| 17                     | 0.73       | 0.005             | 0.65                                                  | 0.42                                               | 0.66 - 0.26                                          |
| 18                     | 0.68       | 0.005             | 0.45                                                  | 0.45                                               | 0.74 - 0.43                                          |
| <b>Hourly forecast</b> |            |                   |                                                       |                                                    |                                                      |
| 1                      | 0.72       | 0.005             | 0.68                                                  | 0.36                                               | 0.71 - 0.27                                          |
| 2                      | 0.67       | 0.005             | 0.45                                                  | 0.53                                               | 0.68 - 0.39                                          |
| 3                      | 0.68       | 0.005             | 0.46                                                  | 0.50                                               | 0.62 - 0.32                                          |
| 4                      | 0.77       | 0.458             | 0.66                                                  | 0.31                                               | 0.77 - 0.32                                          |
| 5                      | 0.97       | 0.005             | 1.00                                                  | 0.04                                               | 1.00 - 0.10                                          |
| 6                      | 0.68       | 0.005             | 0.55                                                  | 0.43                                               | 0.66 - 0.34                                          |
| 7                      | 0.86       | 0.005             | 0.80                                                  | 0.19                                               | 0.77 - 0.19                                          |
| 8                      | 0.78       | 0.005             | 0.73                                                  | 0.27                                               | 0.73 - 0.24                                          |
| 9                      | 0.77       | 0.060             | 0.79                                                  | 0.24                                               | 0.79 - 0.24                                          |
| 10                     | 0.81       | 0.005             | 0.75                                                  | 0.25                                               | 0.72 - 0.17                                          |
| 11                     | 0.68       | 0.010             | 0.43                                                  | 0.51                                               | 0.59 - 0.32                                          |
| 12                     | 0.74       | 0.005             | 0.58                                                  | 0.40                                               | 0.62 - 0.28                                          |
| 13                     | 0.68       | 0.005             | 0.48                                                  | 0.50                                               | 0.71 - 0.42                                          |
| 14                     | 0.82       | 0.005             | 0.75                                                  | 0.23                                               | 0.84 - 0.28                                          |
| 15                     | 0.90       | 0.005             | 0.94                                                  | 0.13                                               | 0.88 - 0.18                                          |
| 16                     | 0.75       | 0.005             | 0.69                                                  | 0.31                                               | 0.69 - 0.19                                          |
| 17                     | 0.74       | 0.005             | 0.69                                                  | 0.37                                               | 0.69 - 0.24                                          |
| 18                     | 0.78       | 0.005             | 0.64                                                  | 0.36                                               | 0.74 - 0.34                                          |

Supplementary Table 3: **Forecasting performances of the multivariate model**
